# Supplementary material
Source: Springer Nature journal article supplement (https://www.springermedizin.de/resource/supplementary/13256_2009_938_MOESM5_ESM.pdf/9646858)

11310276

Contrast:

Gantry: 0°

FoV: 217 mm

Time: 1000 ms

Slice: 3 mm

Pos: -122

HFS

F: B31s

68 mA

120 kV

Image no: 15

Image 81 of 95

19-06-2008, 15:31:18

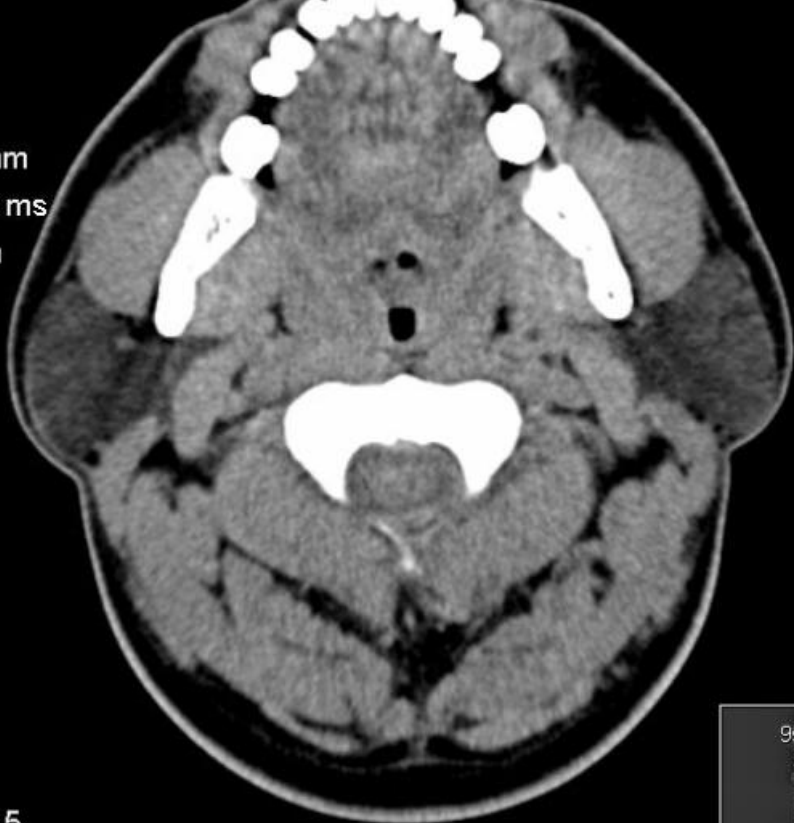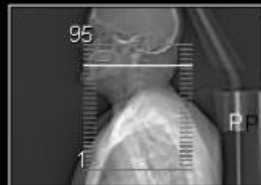

P

F

A4

Supplement: MOESM5 [file 9646858]
